# Supplementary material for: The Contribution of Sleep Texture in the Characterization of Sleep Apnea
Source: Preprints.org preprint supplement (doi:10.20944/preprints202305.2172.v1), 2023-05-31
Supplement: Supplementary file 1 [file supplementary]

**Aknowledgement:** none

**Disclosure of Conflicts of Interest:** The authors declare no financial or other conflicts of interest

**Conceptualization**, LP and CM; Writing: CM and LP – **Original Draft Preparation**, CM, IZ, LP; **Writing – Review & Editing,** all the authors

**REFERENCES**

1. Chiang CL, Chen YT, Wang KL, Su VY, Wu LA, Perng DW, Chang SC, Chen YM, Chen TJ, Chou KT. Comorbidities and risk of mortality in patients with sleep apnea. Ann Med. 2017 Aug;49(5):377-383. doi: 10.1080/07853890.2017.1282167. Epub 2017 Feb 10. PMID: 28276869.
2. Dewan NA, Nieto FJ, Somers VK. Intermittent hypoxemia and OSA: implications for comorbidities. Chest. 2015;147(1):266-74
3. Saito K, Takamatsu Y. Cheyne-Stokes Breathing as a Predictive Indicator of Heart Failure in Patients With Obstructive Sleep Apnea; A Retrospective Case Control Study Using Continuous Positive Airway Pressure Remote Monitoring Data. Front Cardiovasc Med. 2022 Feb 7;9:790331. doi: 10.3389/fcvm.2022.790331. PMID: 35224039; PMCID: PMC8876318.
4. Silva GE, Rojo-Wissar DM, Quan SF, Haynes PL. Predictive ability of the International Classification of Sleep Disorders-3 in identifying risk of obstructive sleep apnea among recently unemployed adults. Sleep Breath. 2021 Sep;25(3):1325-1334. doi: 10.1007/s11325-020-02210-1. Epub 2020 Oct 30. PMID: 33128176; PMCID: PMC8409276.
5. Wojeck BS, Inzucchi SE, Qin L, Yaggi HK. Polysomnographic predictors of incident diabetes and pre-diabetes: an analysis of the DREAM study. J Clin Sleep Med. 2023 Apr 1;19(4):703-710. doi: 10.5664/jcsm.10414. PMID: 36689314; PMCID: PMC10071389.
6. Arnardottir ES, Islind AS, Óskarsdóttir M, Ólafsdóttir KA, August E, Jónasdóttir L, Hrubos-Strøm H, Saavedra JM, Grote L, Hedner J, Höskuldsson S, Ágústsson JS, Jóhannsdóttir KR, McNicholas WT, Pevernagie D, Sund R, Töyräs J, Leppänen T; Sleep Revolution. The Sleep Revolution project: the concept and objectives. J Sleep Res. 2022 Aug;31(4):e13630. doi: 10.1111/jsr.13630. Epub 2022 Jun 30. PMID: 35770626.c
7. Benjafield AV, Ayas NT, Eastwood PR, Heinzer R, Ip MSM, Morrell MJ, Nunez CM, Patel SR, Penzel T, Pépin JL, Peppard PE, Sinha S, Tufik S, Valentine K, Malhotra A. Estimation of the global prevalence and burden of obstructive sleep apnoea: a literature-based analysis. Lancet Respir Med. 2019 Aug;7(8):687-698. doi: 10.1016/S2213-2600(19)30198-5. Epub 2019 Jul 9. PMID: 31300334; PMCID: PMC7007763.
8. Wu B, Cai J, Yao Y, Pan Y, Pan L, Zhang L, Sun Y. [Relationship between sleep architecture and severity of obstructive sleep apnea]. Zhejiang Da Xue Xue Bao Yi Xue Ban. 2020 Aug 25;49(4):455-461. Chinese. doi: 10.3785/j.issn.1008-9292.2020.08.02. PMID: 32985158; PMCID: PMC8800721.
9. Terzano MG, Parrino L, Spaggiari MC. The cyclic alternating pattern sequences in the dynamic organization of sleep. Electroencephalogr Clin Neurophysiol. 1988 May;69(5):437-47. doi: 10.1016/0013-4694(88)90066-1. PMID: 2451591.
10. Halász P, Bódizs R, Parrino L, Terzano M. Two features of sleep slow waves: homeostatic and reactive aspects--from long term to instant sleep homeostasis. Sleep Med. 2014 Oct;15(10):1184-95. doi: 10.1016/j.sleep.2014.06.006. Epub 2014 Jul 8. PMID: 25192672.
11. Parrino L, Ferri R, Bruni O, Terzano MG. Cyclic alternating pattern (CAP): the marker of sleep instability. Sleep Med Rev. 2012 Feb;16(1):27-45. doi: 10.1016/j.smrv.2011.02.003. Epub 2011 May 26. PMID: 21616693.
12. Parrino L, Grassi A, Milioli G. Cyclic alternating pattern in polysomnography: what is it and what does it mean? Curr Opin Pulm Med. 2014 Nov;20(6):533-41. doi: 10.1097/MCP.0000000000000100. PMID: 25188718.
13. Terzano MG, Parrino L, Sherieri A, Chervin R, Chokroverty S, Guilleminault C, Hirshkowitz M, Mahowald M, Moldofsky H, Rosa A, Thomas R, Walters A. Atlas, rules, and recording techniques for the scoring of cyclic alternating pattern (CAP) in human sleep. Sleep Med. 2001 Nov;2(6):537-53. doi: 10.1016/s1389-9457(01)00149-6. Erratum in: Sleep Med. 2002 Mar;3(2):185. PMID: 14592270.
14. Hartmann S, Ferri R, Bruni O, Baumert M. Causality of cortical and cardiovascular activity during cyclic alternating pattern in non-rapid eye movement sleep. Philos Trans A Math Phys Eng Sci. 2021 Dec 13;379(2212):20200248. doi: 10.1098/rsta.2020.0248. Epub 2021 Oct 25. PMID: 34689628.
15. Mutti C, Azzi N, Halasz P, Szucs A, Parrino L. Intra period CAP kinetics to stressful perturbation: a message from obstructive sleep apnea. Sleep Med. 2021 Apr;80:226-227. doi: 10.1016/j.sleep.2021.01.060. Epub 2021 Feb 3. PMID: 33610068.
16. Milioli G, Bosi M, Grassi A, Riccardi S, Terzano MG, Cortelli P, Poletti V, Parrino L. Can sleep microstructure improve diagnosis of OSAS? Integrative information from CAP parameters. Arch Ital Biol. 2015 Jun-Sep;153(2-3):194-203. doi: 10.12871/0003982920152344. PMID: 26742673.
17. Punjabi NM, Lim D. Reply to Dr. Gold's commentary con: Sleep fragmentation causes hypersomnolence in OSA. Sleep Med Rev. 2021 Feb;55:101398. doi: 10.1016/j.smrv.2020.101398. Epub 2020 Nov 18. PMID: 33279758.
18. Gnoni V, Drakatos P, Higgins S, Duncan I, Wasserman D, Kabiljo R, Mutti C, Halasz P, Goadsby PJ, Leschziner GD, Rosenzweig I. Cyclic alternating pattern in obstructive sleep apnea: A preliminary study. J Sleep Res. 2021 Dec;30(6):e13350. doi: 10.1111/jsr.13350. Epub 2021 May 3. PMID: 33939202
19. Anaclet, C., Ferrari, L., Arrigoni, E., Bass, C. E., Saper, C. B., Lu, J., & Fuller, P. M. (2014). The GABAergic parafacial zone is a medullary slow wave sleep-promoting center. *Nature Neuroscience*, *17*, 1217–1224. https:// [doi.org/10.1038/nn.3789](http://doi.org/10.1038/nn.3789)
20. Kaur, S., & Saper, C. B. (2019). Neural circuitry underlying waking up to hypercapnia. *Front Neurosci*, *13*, 401. https://doi.org/10.3389/ fnins.2019.00401
21. Vakulin A, Catcheside PG, Baulk SD, Antic NA, Banks S, Dorrian J, McEvoy RD. Individual variability and predictors of driving simulator impairment in patients with obstructive sleep apnea. J Clin Sleep Med. 2014 Jun 15;10(6):647-55. doi: 10.5664/jcsm.3792. PMID: 24932145; PMCID: PMC4031406.
22. Parekh A, Mullins AE, Kam K, Varga AW, Rapoport DM, Ayappa I. Slow-wave activity surrounding stage N2 K-complexes and daytime function measured by psychomotor vigilance test in obstructive sleep apnea. Sleep. 2019 Mar 1;42(3):zsy256. doi: 10.1093/sleep/zsy256. PMID: 30561750; PMCID: PMC6424089.
23. Parekh A, Kam K, Mullins AE, Castillo B, Berkalieva A, Mazumdar M, Varga AW, Eckert DJ, Rapoport DM, Ayappa I. Altered K-complex morphology during sustained inspiratory airflow limitation is associated with next-day lapses in vigilance in obstructive sleep apnea. Sleep. 2021 Jul 9;44(7):zsab010. doi: 10.1093/sleep/zsab010. PMID: 33433607; PMCID: PMC8271137.
24. Younes M, Ostrowski M, Soiferman M, Younes H, Younes M, Raneri J, Hanly P. Odds ratio product of sleep EEG as a continuous measure of sleep state. Sleep. 2015 Apr 1;38(4):641-54. doi: 10.5665/sleep.4588. PMID: 25348125; PMCID: PMC4355904.
25. Younes M, Azarbarzin A, Reid M, Mazzotti DR, Redline S. Characteristics and reproducibility of novel sleep EEG biomarkers and their variation with sleep apnea and insomnia in a large community-based cohort. Sleep. 2021 Oct 11;44(10):zsab145. doi: 10.1093/sleep/zsab145. PMID: 34156473; PMCID: PMC8503837.
26. Younes M, Hanly PJ. Immediate postarousal sleep dynamics: an important determinant of sleep stability in obstructive sleep apnea. J Appl Physiol (1985). 2016 Apr 1;120(7):801-8. doi: 10.1152/japplphysiol.00880.2015. Epub 2015 Dec 30. PMID: 26718786.
27. Bosi M, Milioli G, Riccardi S, Melpignano A, Vaudano AE, Cortelli P, Poletti V, Parrino L. Arousal responses to respiratory events during sleep: the role of pulse wave amplitude. J Sleep Res. 2018 Apr;27(2):259-267. doi: 10.1111/jsr.12593. Epub 2017 Sep 12. PMID: 28901049.
28. Parrino L, Rausa F, Azzi N, Pollara I, Mutti C. Cyclic alternating patterns and arousals: what is relevant in obstructive sleep apnea? In Memoriam Mario Giovanni Terzano. Curr Opin Pulm Med. 2021 Nov 1;27(6):496-504. doi: 10.1097/MCP.0000000000000825. PMID: 34494978.
29. Terzano MG, Parrino L, Boselli M, Spaggiari MC, Di Giovanni G. Polysomnographic analysis of arousal responses in obstructive sleep apnea syndrome by means of the cyclic alternating pattern. J Clin Neurophysiol. 1996 Mar;13(2):145-55. doi: 10.1097/00004691-199603000-00005. PMID: 8849969.
30. Zitting KM, Lockyer BJ, Azarbarzin A, Sands SA, Wang W, Wellman A, Quan SF. Association of cortical arousals with sleep-disordered breathing events. J Clin Sleep Med. 2023 May 1;19(5):899-912. doi: 10.5664/jcsm.10492. PMID: 36708264; PMCID: PMC10152355.
31. Korkmaz S, Bilecenoglu NT, Aksu M, Yoldas TK. Cyclic Alternating Pattern in Obstructive Sleep Apnea Patients with versus without Excessive Sleepiness. Sleep Disord. 2018 May 16;2018:8713409. doi: 10.1155/2018/8713409. PMID: 29862087; PMCID: PMC5976911.
32. Chen S, Li Q, Zou X, Zhong Z, Ouyang Q, Wang M, Luo Y, Yao D. Effects of CPAP Treatment on Electroencephalographic Activity in Patients with Obstructive Sleep Apnea Syndrome During Deep Sleep with Consideration of Cyclic Alternating Pattern. Nat Sci Sleep. 2022 Nov 21;14:2075-2089. doi: 10.2147/NSS.S382305. PMID: 36440180; PMCID: PMC9697441.
33. Parrino L, Thomas RJ, Smerieri A, Spaggiari MC, Del Felice A, Terzano MG. Reorganization of sleep patterns in severe OSAS under prolonged CPAP treatment. Clin Neurophysiol. 2005 Sep;116(9):2228-39. doi: 10.1016/j.clinph.2005.05.005. PMID: 16040272.
34. Parrino L, Smerieri A, Boselli M, Spaggiari MC, Terzano MG. Sleep reactivity during acute nasal CPAP in obstructive sleep apnea syndrome. Neurology. 2000 Apr 25;54(8):1633-40. doi: 10.1212/wnl.54.8.1633. PMID: 10762505.
35. Gnoni V, Mesquita M, O’Regan D, Delogu A, Chakalov I, Antal A, Young AH, Bucks RS, Jackson ML and Rosenzweig I (2023) Distinct cognitive changes in male patients with obstructive sleep apnoea without co-morbidities. *Front. Sleep* 2:1097946. doi: 10.3389/frsle.2023.1097946
36. Gu Y, Gagnon JF, Kaminska M. Sleep electroencephalography biomarkers of cognition in obstructive sleep apnea. J Sleep Res. 2023 Mar 20:e13831. doi: 10.1111/jsr.13831. Epub ahead of print. PMID: 36941194.
37. Li N, Wang J, Wang D, Wang Q, Han F, Jyothi K, Chen R. Correlation of sleep microstructure with daytime sleepiness and cognitive function in young and middle-aged adults with obstructive sleep apnea syndrome. Eur Arch Otorhinolaryngol. 2019 Dec;276(12):3525-3532. doi: 10.1007/s00405-019-05529-y. Epub 2019 Jul 1. PMID: 31263979.
38. Karimzadeh F, Nami M, Boostani R. Sleep microstructure dynamics and neurocognitive performance in obstructive sleep apnea syndrome patients. J Integr Neurosci. 2017;16(2):127-142. doi: 10.3233/JIN-170004. PMID: 28891505.
39. Miano S, Castelnovo A, Bruni O, Manconi M. Sleep microstructure in attention deficit hyperactivity disorder according to the underlying sleep phenotypes. J Sleep Res. 2022 Feb;31(1):e13426. doi: 10.1111/jsr.13426. Epub 2021 Jun 24. Erratum in: J Sleep Res. 2023 Apr;32(2):e13780. PMID: 34169594.
40. Miano S, Bruni O, Elia M, Scifo L, Smerieri A, Trovato A, Verrillo E, Terzano MG, Ferri R. Sleep phenotypes of intellectual disability: a polysomnographic evaluation in subjects with Down syndrome and Fragile-X syndrome. Clin Neurophysiol. 2008 Jun;119(6):1242-7. doi: 10.1016/j.clinph.2008.03.004. Epub 2008 Apr 15. PMID: 18417419.
41. Bailly S, Grote L, Hedner J, Schiza S, McNicholas WT, Basoglu OK, Lombardi C, Dogas Z, Roisman G, Pataka A, Bonsignore MR, Pepin JL; ESADA Study Group. Clusters of sleep apnoea phenotypes: A large pan-European study from the European Sleep Apnoea Database (ESADA). Respirology. 2021 Apr;26(4):378-387. doi: 10.1111/resp.13969. Epub 2020 Nov 2. PMID: 33140467.
42. Zinchuk, A. V., Gentry, M. J., Concato, J., & Yaggi, H. K. (2017). Phenotypes in obstructive sleep apnea: A definition, examples and evolution of approaches. *Sleep medicine reviews*, *35*, 113–123. <https://doi.org/10.1016/j.smrv.2016.10.002>
43. Sutherland K, Takaya H, Qian J, Petocz P, Ng AT, Cistulli PA. Oral Appliance Treatment Response and Polysomnographic Phenotypes of Obstructive Sleep Apnea. J Clin Sleep Med. 2015 Aug 15;11(8):861-8. doi: 10.5664/jcsm.4934. PMID: 25845897; PMCID: PMC4513263.
44. Appleton, S. L., Vakulin, A., Martin, S. A., Lang, C. J., Wittert, G. A., Taylor, A. W., McEvoy, R. D., Antic, N. A., Catcheside, P. G., & Adams, R. J. (2016). Hypertension Is Associated With Undiagnosed OSA During Rapid Eye Movement Sleep. Chest, 150(3), 495–505. <https://doi.org/10.1016/j.chest.2016.03.010>
45. Aurora RN, Crainiceanu C, Gottlieb DJ, Kim JS, Punjabi NM. Obstructive Sleep Apnea during REM Sleep and Cardiovascular Disease. Am J Respir Crit Care Med. 2018 Mar 1;197(5):653-660. doi: 10.1164/rccm.201706-1112OC. PMID: 29112823; PMCID: PMC6005240.
46. Joosten, S. A., Landry, S. A., Wong, A. M., Mann, D. L., Terrill, P. I., Sands, S. A., Turton, A., Beatty, C., Thomson, L., Hamilton, G. S., & Edwards, B. A. (2021). Assessing the Physiologic Endotypes Responsible for REM- and NREM-Based OSA. *Chest*, *159*(5), 1998–2007. <https://doi.org/10.1016/j.chest.2020.10.080>
47. Thomas RJ, Terzano MG, Parrino L, Weiss JW. Obstructive sleep-disordered breathing with a dominant cyclic alternating pattern--a recognizable polysomnographic variant with practical clinical implications. Sleep. 2004 Mar 15;27(2):229-34. doi: 10.1093/sleep/27.2.229.
48. Smales, E. T., Edwards, B. A., Deyoung, P. N., McSharry, D. G., Wellman, A., Velasquez, A., Owens, R., Orr, J. E., & Malhotra, A. (2015). Trazodone Effects on Obstructive Sleep Apnea and Non-REM Arousal Threshold. Annals of the American Thoracic Society, 12(5), 758–764. https://doi.org/10.1513/AnnalsATS.201408-399OC
49. Parrino L. Now that automatic processing makes CAP scoring fast and reliable is the sleep field ready for a paradigm shift? Sleep. 2023 Jan 11;46(1):zsac255. doi: 10.1093/sleep/zsac255. PMID: 36394264.

**FIGURE CAPTIONS**

**FIG.1** Example of a nocturnal pulse oximetry profile (upper part of the figure), with a detail on her nocturnal respiratory events (lower part of the figure), in a female patient affected by mild OSA (AHI 12,2 events/h). Despite the lower value of AHI her hypopneas (highlighted in light green) were associated with severe drop of oxygen saturation and respiratory efforts.

**FIG.2** Polysomnographic example of a patient affected by severe OSA before (panel A) and after (panel B) the introduction of CPAP. Panel A: note the tight association between apneas and cyclic alternating pattern (CAP) oscillations, with strong prevalence of subtypes A2 and A3, with high autonomic impact; panel B: observe the restoration of physiologic CAP oscillations, with predominance of subtypes A1.
